# Supplementary material for: Relationship between teaching assistants’ perceptions of student learning challenges and their use of external representations when teaching acid–base titrations in introductory chemistry laboratory courses
Source: Royal Society of Chemistry journal article supplement (doi:10.1039/c9rp00013e), 2019-01-01
Supplement: c9rp00013e1.pdf [file c9rp00013e1.pdf]

## Representations in the science laboratory- Peer review

| <b>Best Practices Suggestion</b>                                                                                       | <b>Comments</b> |
|------------------------------------------------------------------------------------------------------------------------|-----------------|
| What would the students discuss about the representation in a group?                                                   |                 |
| What information should the student already have mastered in order to understand the content?                          |                 |
| What content does the image contain? What are the take home points?                                                    |                 |
| What do the conventions used in the image mean?                                                                        |                 |
| Are there other representations that could compare and contrast to this one? What would they contain?                  |                 |
| In what way could students generate their own representations on the same topic? What information would those contain? |                 |
